# Supplementary material for: A Randomised Controlled Trial of Clinician-Guided Internet-Based Cognitive Behavioural Therapy for Depressed Patients in Singapore
Source: PubMed Central journal article supplement (PMC8359863; doi:10.3389/fpsyg.2021.668384), 2021-07-29
Supplement: Data_Sheet_1.pdf [file Data_Sheet_1.pdf]

## *Supplementary Material*

### **Supplementary Data**

#### **Initial comparison arm**

##### **Per-protocol Treatment Response**

Per-protocol analysis revealed that in the initial comparison arm, the treatment group had significantly lower post-treatment scores as compared to pre-treatment on the PHQ-9 ( $F_{1,15} = 10.80, p = 0.01$ ). There were no significant changes in GAD-7 ( $F_{1,15} = 2.48, p = 0.14$ ), WSAS ( $F_{1,15} = 1.75, p = 0.21$ ) or K-10 ( $F_{1,15} = 0.67, p = 0.43$ ).

##### **Per-protocol Control Response**

Per-protocol analysis showed that in the initial comparison arm, there were no significant changes in the control group on the PHQ-9 ( $F_{1,7} = 0.26, p = 0.63$ ), GAD-7 ( $F_{1,7} = 0.05, p = 0.84$ ), WSAS ( $F_{1,7} = 0.004, p = 0.95$ ), and K-10 ( $F_{1,7} = 0.20, p = 0.67$ ).

##### **Intention-to-treat Treatment Response**

Intention-to-treat analysis revealed that in the initial comparison arm, the treatment group had marginally significantly lower post-treatment scores as compared to pre-treatment on the PHQ-9 ( $F_{1,21} = 4.20, p = 0.05$ ). There was no significant change in GAD-7 ( $F_{1,21} = 0.30, p = 0.59$ ), WSAS ( $F_{1,21} = 2.56, p = 0.13$ ) and K-10 ( $F_{1,21} = 0.45, p = 0.51$ ).

##### **Intention-to-treat Control Response**

Intention-to-treat analysis showed that in the initial comparison arm, there were no significant changes in the control group on the PHQ-9, ( $F_{1,21} = 1.40, p = 0.25$ ), GAD-7 ( $F_{1,21} = 0.01, p = 0.92$ ), WSAS ( $F_{1,21} = 0.04, p = 0.85$ ) and K-10 ( $F_{1,21} = 0.13, p = 0.72$ ).

#### **Cross-over arm**

##### **Per-protocol Treatment Response**

Per-protocol analysis revealed that in the cross-over arm, the cross-over treatment was associated with significantly lower post-treatment scores as compared to pre-treatment on the GAD-7 ( $F_{1,11} = 10.37, p = 0.01$ ) and K-10 ( $F_{1,11} = 5.21, p = 0.04$ ). There were no significant changes observed in the PHQ-9 ( $F_{1,11} = 1.78, p = 0.21$ ) and the WSAS ( $F_{1,11} = 0.57, p = 0.47$ ).

##### **Per-protocol Control Response**

Per-protocol analysis revealed in the initial treatment group there were no significant changes with time from post-treatment to follow-up in the PHQ-9 ( $F_{1,18} = 0.43, p = 0.52$ ), GAD-7 ( $F_{1,18} = 0.64, p = 0.44$ ), WSAS ( $F_{1,18} = 0.01, p = 0.92$ ), and K-10 ( $F_{1,18} = 0.75, p = 0.40$ ).

##### **Intention-to-treat Treatment Response**

Intention-to-treat analysis revealed that in the cross-over arm, the cross-over treatment was associated with significantly lower post-treatment scores as compared to pre-treatment on the GAD-7 ( $F_{1,22} = 10.37, p = .004$ ) and K-10 ( $F_{1,22} = 7.78, p = 0.01$ ). There were no significant changes observed in the PHQ-9 ( $F_{1,22} = 2.79, p = 0.11$ ) and the WSAS ( $F_{1,22} = 1.38, p = 0.25$ ).

### **Intention-to-treat Control Response**

Per-protocol analysis revealed in the initial treatment group there were no significant changes with time from post-treatment to follow-up in the PHQ-9 ( $F_{1,22} = 0.63, p = 0.44$ ), GAD-7 ( $F_{1,22} = 0.37, p = 0.55$ ), WSAS ( $F_{1,22} = 0.01, p = 0.92$ ) and K-10 ( $F_{1,22} = 0.66, p = 0.43$ ).
